# Supplementary material
Source: Springer Nature journal article supplement (https://www.springermedizin.de/resource/supplementary/12974_2011_451_MOESM5_ESM.pdf/9601352)

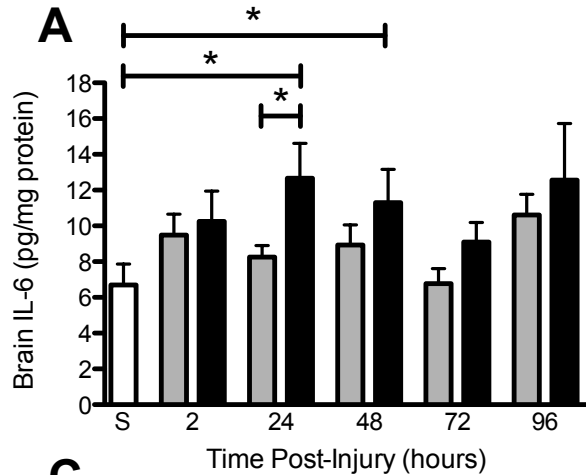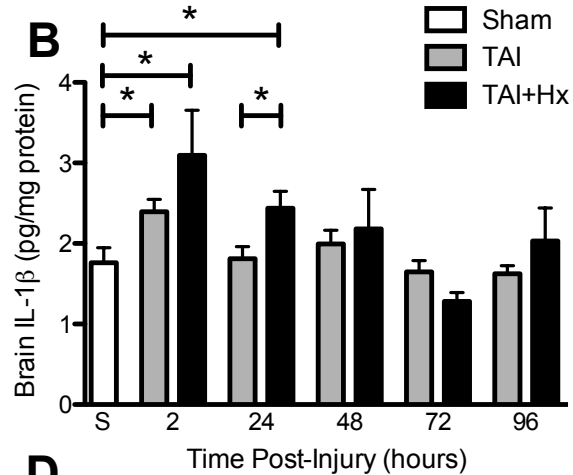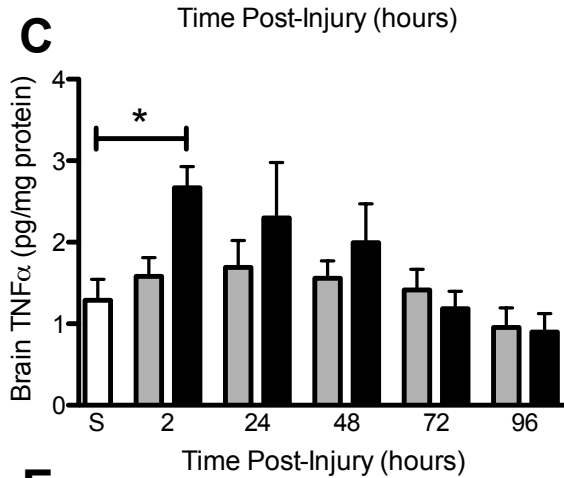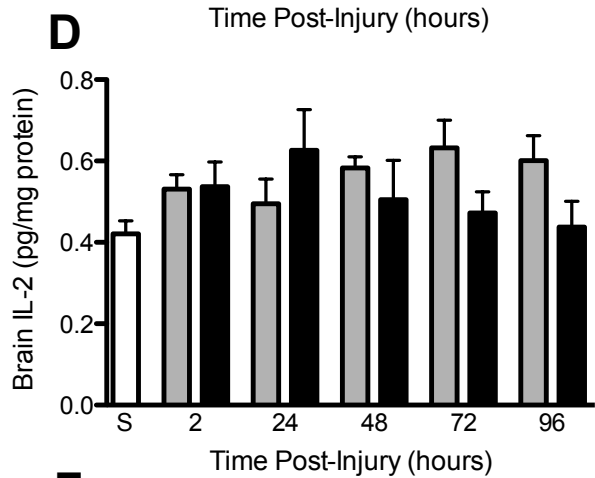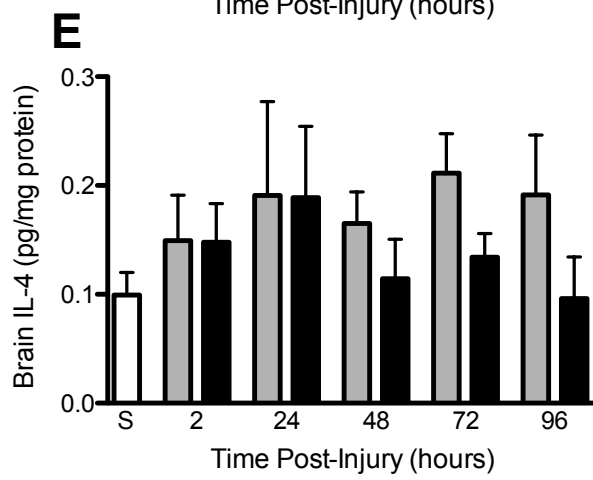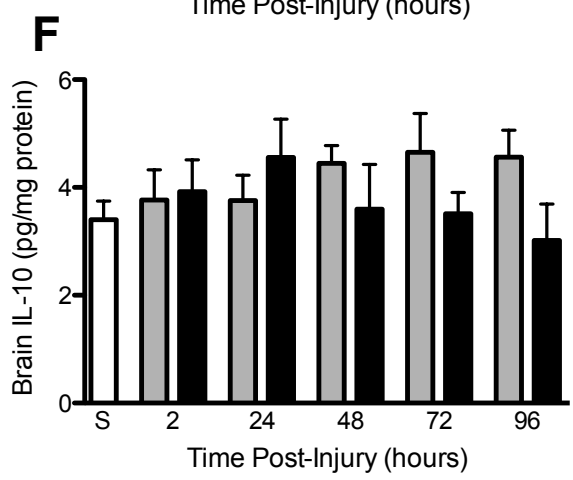

Supplement: MOESM5 [file 9601352]
